# Supplementary material
Source: publisher figshare collection journal article supplement (https://tandf.figshare.com/ndownloader/files/21902160)
Supplement: Supplementary file 1 [file 21902160]

| Supplementary Table 2 | | | | | | | | | | | | | | | |
| --- | --- | --- | --- | --- | --- | --- | --- | --- | --- | --- | --- | --- | --- | --- | --- |
| Table S-2  *Results of bivariate correlations between discourse measures* | | | | | | | | | | | | | | | | |
| Measure | 1 | 2 | 3 | 4 | 5 | 6 | 7 | 8 | 9 | 10 | 11 | 12 | 13 | 14 | 15 | | |
| 1. C-units |  |  |  |  |  |  |  |  |  |  |  |  |  |  |  | | |
| 2. NDW | **.94**** |  |  |  |  |  |  |  |  |  |  |  |  |  |  | | |
| 3. Mazes | **.84**** | **.74**** |  |  |  |  |  |  |  |  |  |  |  |  |  | | |
| 4. %Maze Words | .12 | .02 | .53** |  |  |  |  |  |  |  |  |  |  |  |  | | |
| 5. MLUw | .07 | **.28**** | .05 | **-.16*** |  |  |  |  |  |  |  |  |  |  |  | | |
| 6. Clausal density | -.15 | -.05 | -.08 | -.06 | **.53**** |  |  |  |  |  |  |  |  |  |  | | |
| 7. Total referential ties | **.91**** | **.91**** | **.72**** | .03 | **.18*** | -.10 |  |  |  |  |  |  |  |  |  | | |
| 8. Cohesive adequacy | **.47**** | **.56**** | **.36**** | -.11 | **.22*** | -.04 | **.47**** |  |  |  |  |  |  |  |  | | |
| 9. %CIU | -.18* | -.05 | **-.42**** | **-.71**** | **.27**** | **.21*** | -.11 | .12 |  |  |  |  |  |  |  | | |
| 10. CIUpm | .09 | .15 | .04 | -.06 | **.23*** | **.18*** | -.09 | **.22*** | **.30**** |  |  |  |  |  |  | | |
| 11. Local coherence | -.04 | .01 | -.08 | -.08 | .15 | .12 | -.09 | .05 | **.38**** | **.23*** |  |  |  |  |  | | |
| 12. Global coherence | **-.37**** | **-.28**** | **-.37**** | **-.21*** | **.28**** | **.17*** | **-.24**** | -.07 | **.48**** | **.23*** | **.44**** |  |  |  |  | | |
| 13. Schema deviations | **.63**** | **.56**** | **.54**** | .105 | .02 | **-.19*** | **.53**** | **.23*** | **-.19*** | .06 | .003 | **-.33**** |  |  |  | | |
| 14. Genre shifts | **.61**** | **.54**** | **.57**** | .10 | .01 | -.08 | **.52**** | **.23*** | **-.19*** | -.04 | -.02 | **-.35**** | **.45**** |  |  | | |
| 15. Order deviations | **.32**** | **.30**** | **.28**** | .01 | .00 | -.09 | **.33**** | .16 | -.05 | -.09 | -.07 | **-.19*** | **.23*** | **.42**** |  | | |
| 16. RSQs | **.17*** | .15 | .10 | .04 | -.20* | -.14 | .13 | .05 | -.11 | -.04 | -.13 | **-.23*** | **.35**** | .05 | .07 | | |
| *Note:* Values reported are Pearson’s correlation coefficients (*r*).Bolded values are significant at ** *p*<.001, **p*<.05. NDW = number of different words; MLU = mean length of utterance in words; CIU = correct information unit (Nicholas & Brookshire, 1993); RSQ = restatements of question. | | | | | | | | | | | | | | | | |
